# Supplementary material for: Does case management for patients with heart failure based in the community reduce unplanned hospital admissions? A systematic review and meta-analysis
Source: PubMed Central journal article supplement — BMJ Open. 2016 May 10;6(5):e010933. doi: 10.1136/bmjopen-2015-010933 (PMC4874181; doi:10.1136/bmjopen-2015-010933), 2016-05-10
Supplement: bmjopen-2015-010933supp_Appendix1.pdf [file bmjopen-2015-010933supp_Appendix1.pdf]

## Appendix 1:

Database: Medline In-process - Current week, Medline 1950 to present

Search Strategy:

---

- 1 randomized controlled trial.pt. (376608)
- 2 random\$.tw. (717987)
- 3 control\$.tw. (2630023)
- 4 intervention\$.tw. (556397)
- 5 evaluat\$.tw. (2214967)
- 6 or/1-5 (5041451)
- 7 Qualitative Research/ (20094)
- 8 semi-structured questionnaire.mp. (1162)
- 9 observation methods.mp. (152)
- 10 Observation/mt [Methods] (635)
- 11 Nvivo.mp. (639)
- 12 interview/ (25018)
- 13 Personal Narratives/ (877)
- 14 Focus Groups/ (16824)
- 15 patient experience\*.mp. (8525)
- 16 or/7-15 (70071)
- 17 exp Heart Failure/ (87270)
- 18 exp Heart Failure, Diastolic/ (496)
- 19 exp heart failure, systolic/ (789)
- 20 exp Ventricular Dysfunction/ (26332)
- 21 chronic heart failure.mp. (11341)
- 22 congestive heart failure.mp. (33082)
- 23 cardiac failure.mp. (10151)
- 24 LV dysfunction.mp. (2827)
- 25 left ventricular dysfunction.mp. (9373)
- 26 left ventricular impairment.mp. (188)
- 27 diastolic impairment.mp. (121)
- 28 systolic impairment.mp. (93)
- 29 or/17-28 (135885)
- 30 exp Case Management/ (8326)
- 31 exp Patient Care Planning/ (52319)
- 32 organisation of care.mp. (367)
- 33 community matron.mp. (44)

34 "Continuity of Patient Care"/ (14497)  
 35 Community Health Nursing/ (18371)  
 36 transit\* care.mp. (580)  
 37 Interdisciplinary Communication/ (10602)  
 38 Patient Discharge/ (18977)  
 39 discharge plan.mp. (176)  
 40 exp Patient Care Management/ (535496)  
 41 Comprehensive Health Care/ (6078)  
 42 exp Managed Care Programs/ (38918)  
 43 Primary Health Care/ (54234)  
 44 Community Health Services/ (26923)  
 45 General Practitioners/ (1943)  
 46 Family Practice/ (60223)  
 47 Physicians, Family/ (14745)  
 48 multidisciplinary.mp. (44988)  
 49 or/30-48 (674050)  
 50 6 or 16 (5094326)  
 51 29 and 50 (47009)  
 52 49 and 51 (2590)  
 53 52 not (case report/ or case study/ or letter/ or editorial/ or expert opinion.mp.) (2489)  
 54 53 not (Algeria\$ or Egypt\$ or Liby\$ or Morocc\$ or Tunisia\$ or Western Sahara\$ or Angola\$ or Benin or Botswana\$ or Burkina Faso or Burundi or Cameroon or Cape Verde or Central African Republic or Chad or Comoros or Congo or Djibouti or Eritrea or Ethiopia\$ or Gabon or Gambia\$ or Ghana or Guinea or Keny\$ or Lesotho or Liberia or Madagasca\$ or Malawi or Mali or Mauritania or Mauritius or Mayotte or Mozambiq\$ or Namibia\$ or Niger or Nigeria\$ or Reunion or Rwand\$ or Saint Helena or Senegal or Seychelles or Sierra Leone or Somalia or South Africa\$ or Sudan or Swaziland or Tanzania or Togo or Ugand\$ or Zambia\$ or Zimbabw\$ or China or Chinese or Hong Kong or Macao or Mongolia\$ or Taiwan\$ or Belarus or Moldov\$ or Russia\$ or Ukraine or Afghanistan or Armenia\$ or Azerbaijan or Bahrain or Cyprus or Cypriot or Georgia\$ or Iran\$ or Iraq\$ or Israel\$ or Jordan\$ or Kazakhstan or Kuwait or Kyrgyzstan or Leban\$ or Oman or Pakistan\$ or Palestin\$ or Qatar or Saudi Arabia or Syria\$ or Tajikistan or Turkmenistan or United Arab Emirates or Uzbekistan or Yemen or Bangladesh\$ or Bhutan or British Indian Ocean Territory or Brunei Darussalam or Cambodia\$ or India\$ or Indonesia\$ or Lao or People's Democratic Republic or Malaysia\$ or Maldives or Myanmar or Nepal or Philippin\$ or Singapore or Sri Lanka or Thai\$ or Timor Leste or Vietnam or Albania\$ or Andorra or Bosnia\$ or Herzegovina\$ or Bulgaria\$ or Croatia\$ or Estonia or Faroe Islands or Greenland or Liechtenstein or Lithuani\$ or Macedonia or Malta or maltese or Romania or Serbia\$ or Montenegro or Slovenia or Svalbard or

Argentina\$ or Belize or Bolivia\$ or Brazil\$ or chile or Chilean or Colombia\$ or Costa Rica\$ or  
Cuba or Ecuador or El Salvador or French Guiana or Guatemala\$ or Guyana or Haiti or  
Honduras or Jamaica\$ or Nicaragua\$ or Panama or Paraguay or Peru or Puerto Rico or  
Suriname or Uruguay or Venezuela or developing countr\$ or south America\$).ti,sh. (2413)

55 54 not animal/ (2393)

56 remove duplicates from 55 (2335)

\*\*\*\*\*
