# Supplementary material for: Does case management for patients with heart failure based in the community reduce unplanned hospital admissions? A systematic review and meta-analysis
Source: PubMed Central journal article supplement — BMJ Open. 2016 May 10;6(5):e010933. doi: 10.1136/bmjopen-2015-010933 (PMC4874181; doi:10.1136/bmjopen-2015-010933), 2016-05-10
Supplement: bmjopen-2015-010933supp_Appendix2.pdf [file bmjopen-2015-010933supp_Appendix2.pdf]

## Appendix 2: Subgroup-analysis of unplanned readmission data by intervention component- hospital initiated studies

### a) Family involvement

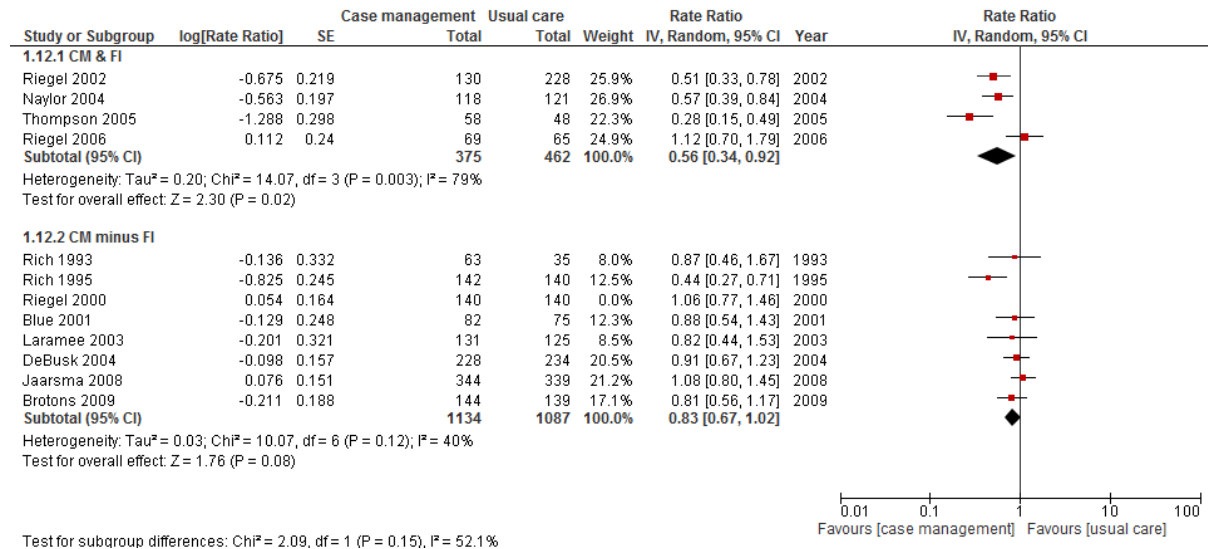

Sensitivity analysis (removing Riegel 2002) Test for subgroup differences Chi<sup>2</sup> 0.98 df=1 (p=0.32) I<sup>2</sup>-0%

### b) education & self-management

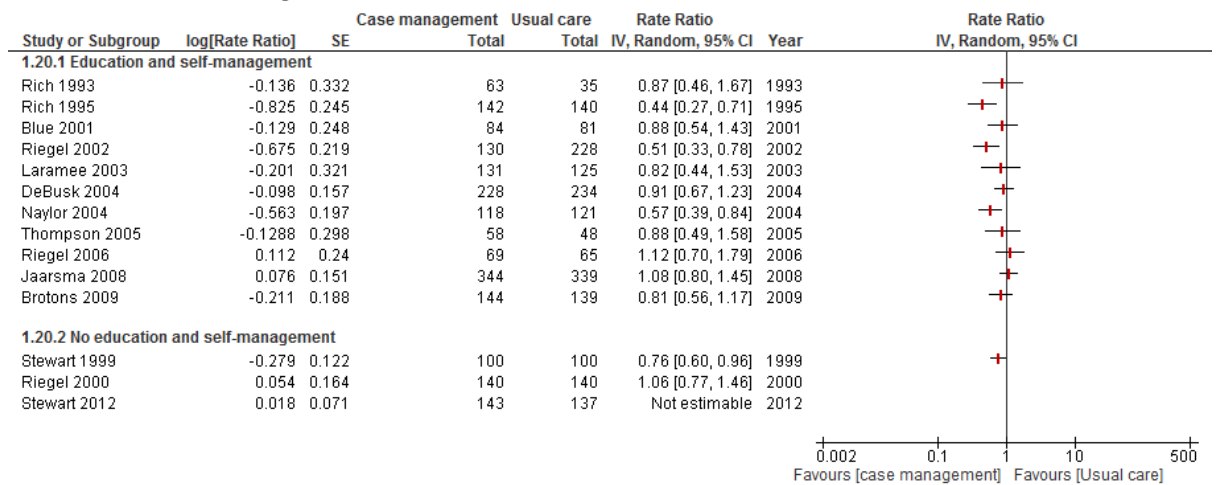

There were inadequate data in the no education/self-management group to perform a comparison.

c) medication review

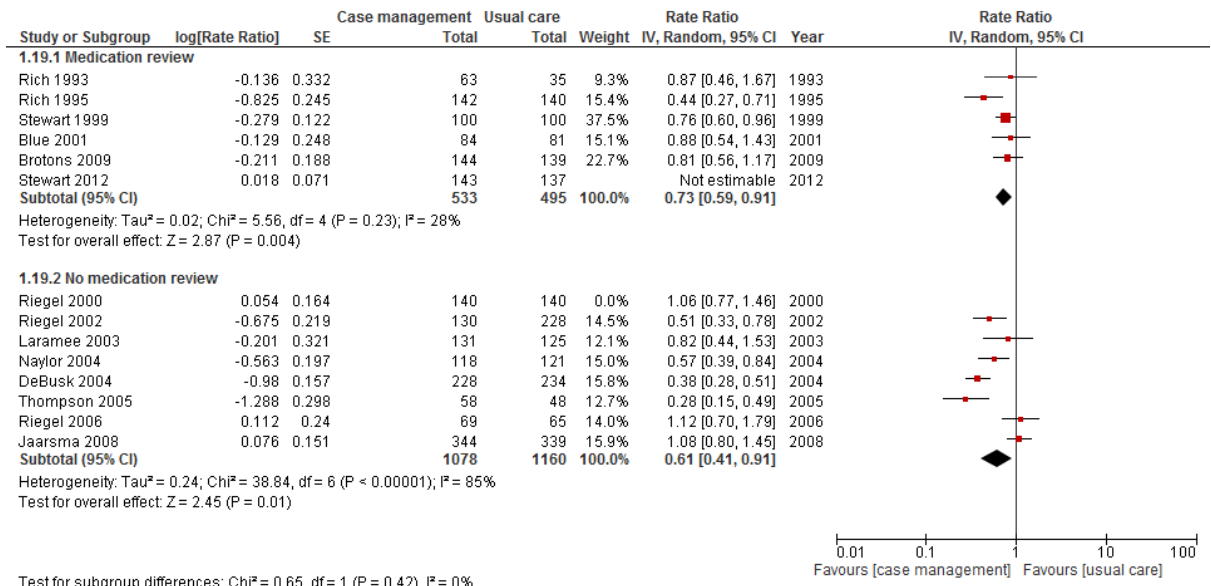

Sensitivity analysis (removing Riegel 2002) Test for subgroup differences Chi<sup>2</sup> 0.36 df=1 (p=0.55) I<sup>2</sup>=0%

d) Referral to other services

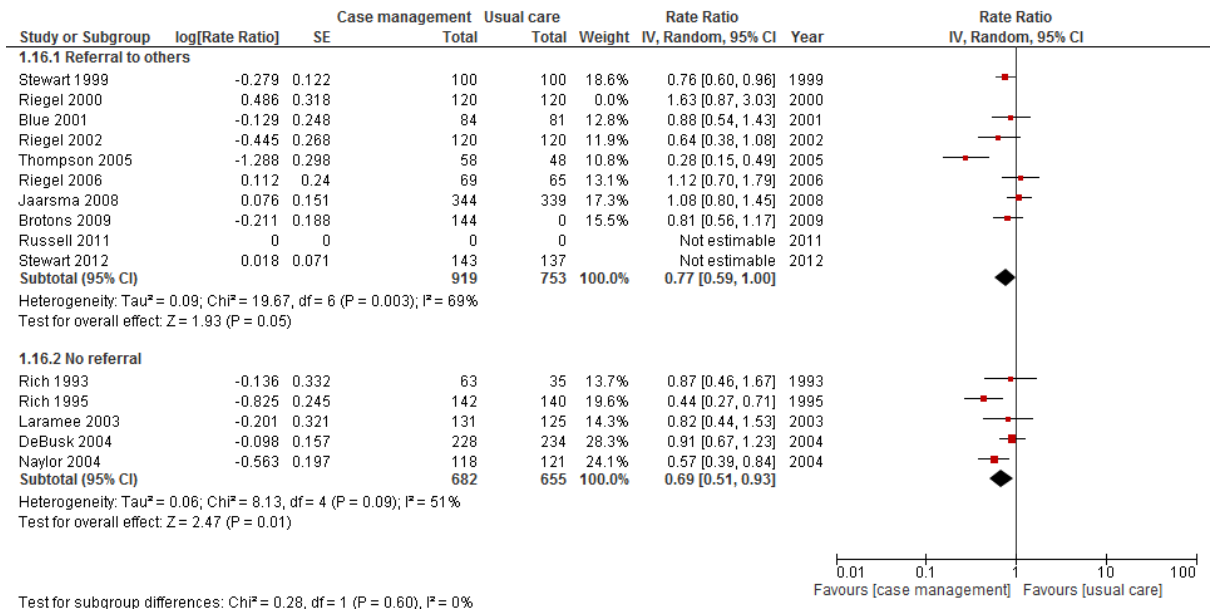

Sensitivity analysis (removing Riegel 2002) Test for subgroup differences Chi<sup>2</sup> 0.36 df=1 (p=0.55) I<sup>2</sup>=0%

e) Assessment of home environment

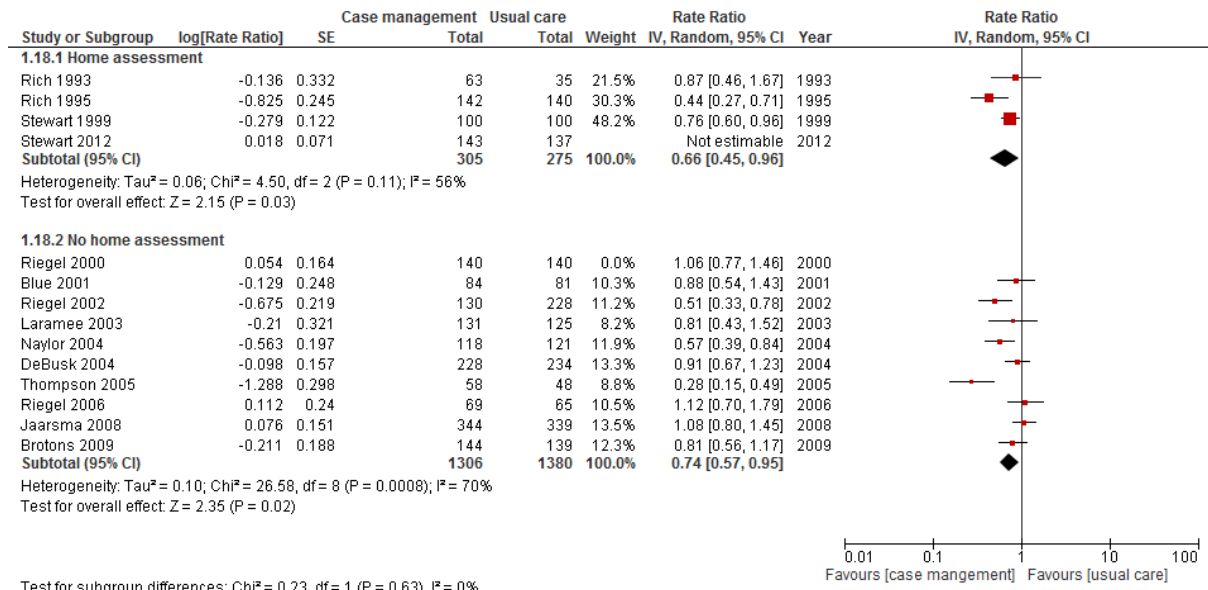

Sensitivity analysis (removing Riegel 2002) Test for subgroup differences Chi<sup>2</sup> 0.46 df=1 (p=0.50) I<sup>2</sup>=0%

f) Case management/health professional meetings

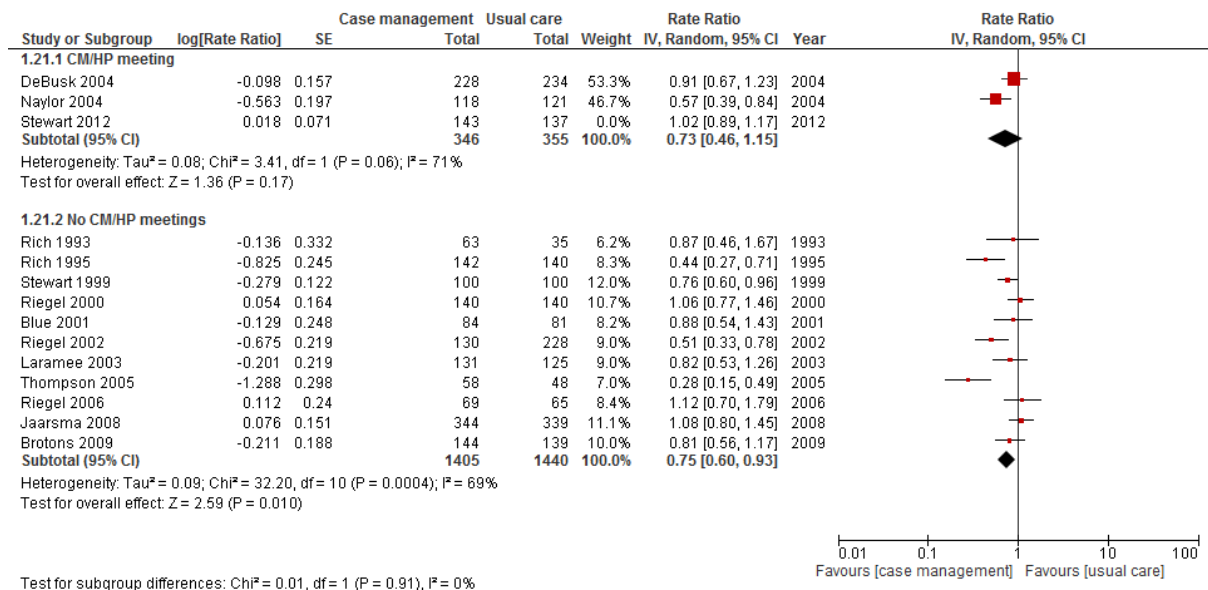

Sensitivity analysis (removing Riegel 2002) Test for subgroup differences Chi<sup>2</sup> 0.07 df=1 (p=0.07) I<sup>2</sup>=0%

g) Patient-directed access

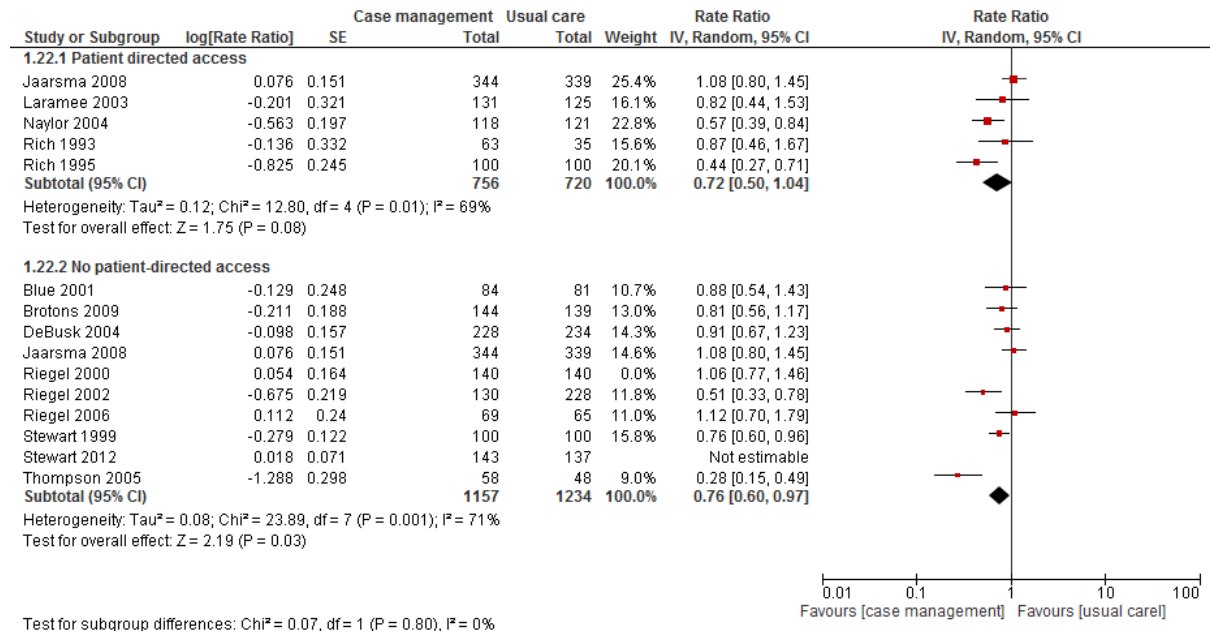

Sensitivity analysis (removing Riegel 2002) Test for subgroup differences Chi<sup>2</sup> 0.25 df=1 (p=0.61) I<sup>2</sup>=0%
